# Supplementary material
Source: PubMed Central journal article supplement (PMC4978035)
Supplement: ASN.2015020154_ASN2015020154SupplementaryData.pdf [file ASN.2015020154_ASN2015020154SupplementaryData.pdf]

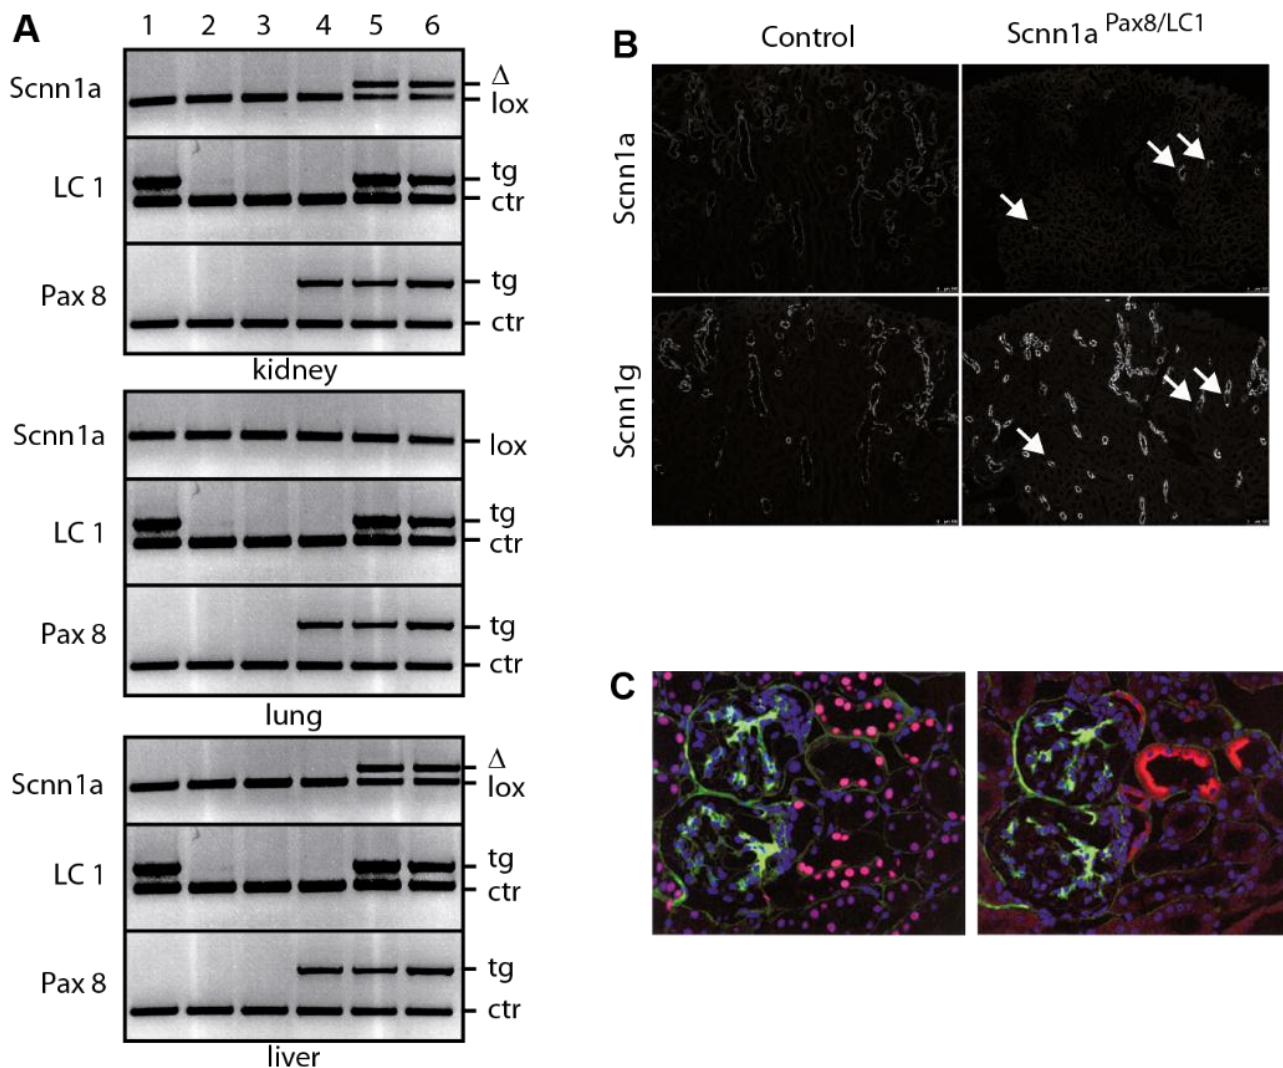

### Supplementary Figure 1 Generation of inducible nephron-specific Scnn1a<sup>Pax8/LC1</sup> mice.

(A) Genotyping using Scnn1a, Pax8 and LC1 specific primers from the whole kidney (upper), lung (middle) and liver (lower panel) from control (lanes 1-4) and experimental animals (lanes 5 and 6); lane 1: Scnn1a<sup>lox/lox;+/LC1</sup>; lanes 2 and 3: Scnn1a<sup>lox/lox</sup>; lane 4: Scnn1a<sup>lox/lox;+/Pax8-rtTA</sup>; and experimental mice: lanes 5 and 6: Scnn1a <sup>$\Delta$ /lox,+/Pax8-rtTA;+/LC1</sup>. (B) Immunofluorescent detection of  $\alpha$  and  $\gamma$  ENaC in consecutive kidney sections from either a control or a Scnn1a<sup>Pax8/LC1</sup> mouse on a regular salt diet following two months of rescue diet. Arrows point to the very few renal tubules with remaining  $\alpha$  ENaC abundance in the Scnn1a<sup>Pax8/LC1</sup> mouse. (C) Immunofluorescent detection of Cre (purple) and  $\alpha$ ENaC (red staining) on consecutive kidney sections from Scnn1a<sup>Pax8/LC1</sup> mice on a regular diet following two months of rescue diet. The green fluorescence is related to binding of a FITC-conjugated anti-mouse IgG to deposits of endogenous immunoglobulin in the glomerular mesangium and kidney interstitium. Cell nuclei were counterstained with DAPI (blue).

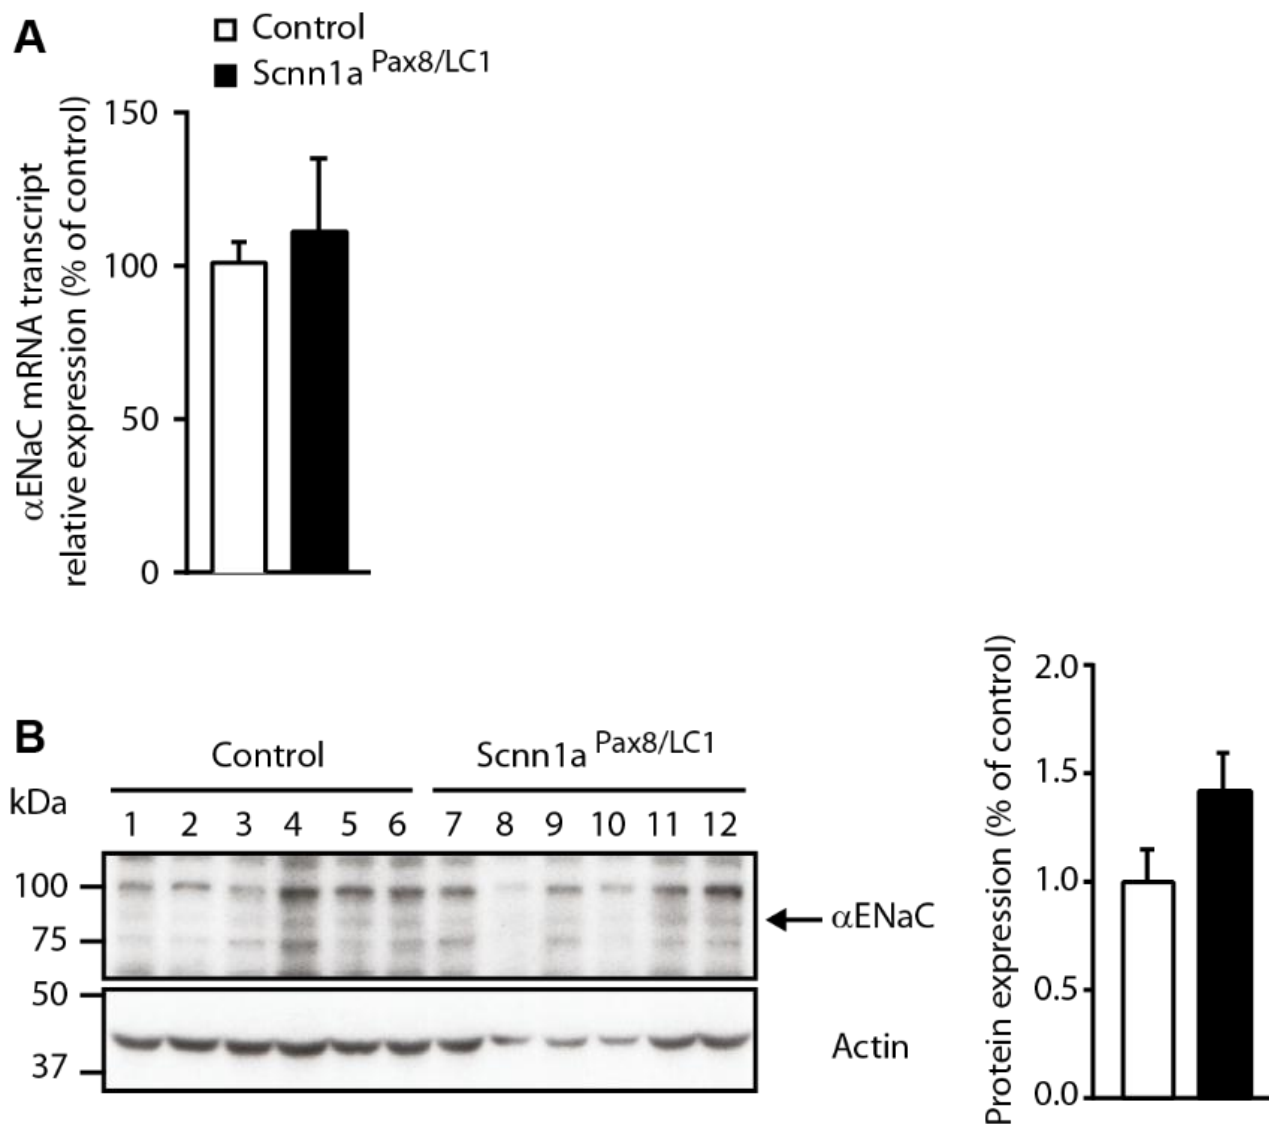

### Supplementary Figure 2 αENaC detection in whole liver extracts.

(A) Scnn1a (αENaC) mRNA transcript expression in whole liver using quantitative real-time PCR normalized to β-actin. (B) Western blot analysis and protein expression quantification relative to β-actin for αENaC on whole liver extracts of control (n=6) and Scnn1a<sup>Pax8/LC1</sup> knockout mice (n=6) under standard salt diet.

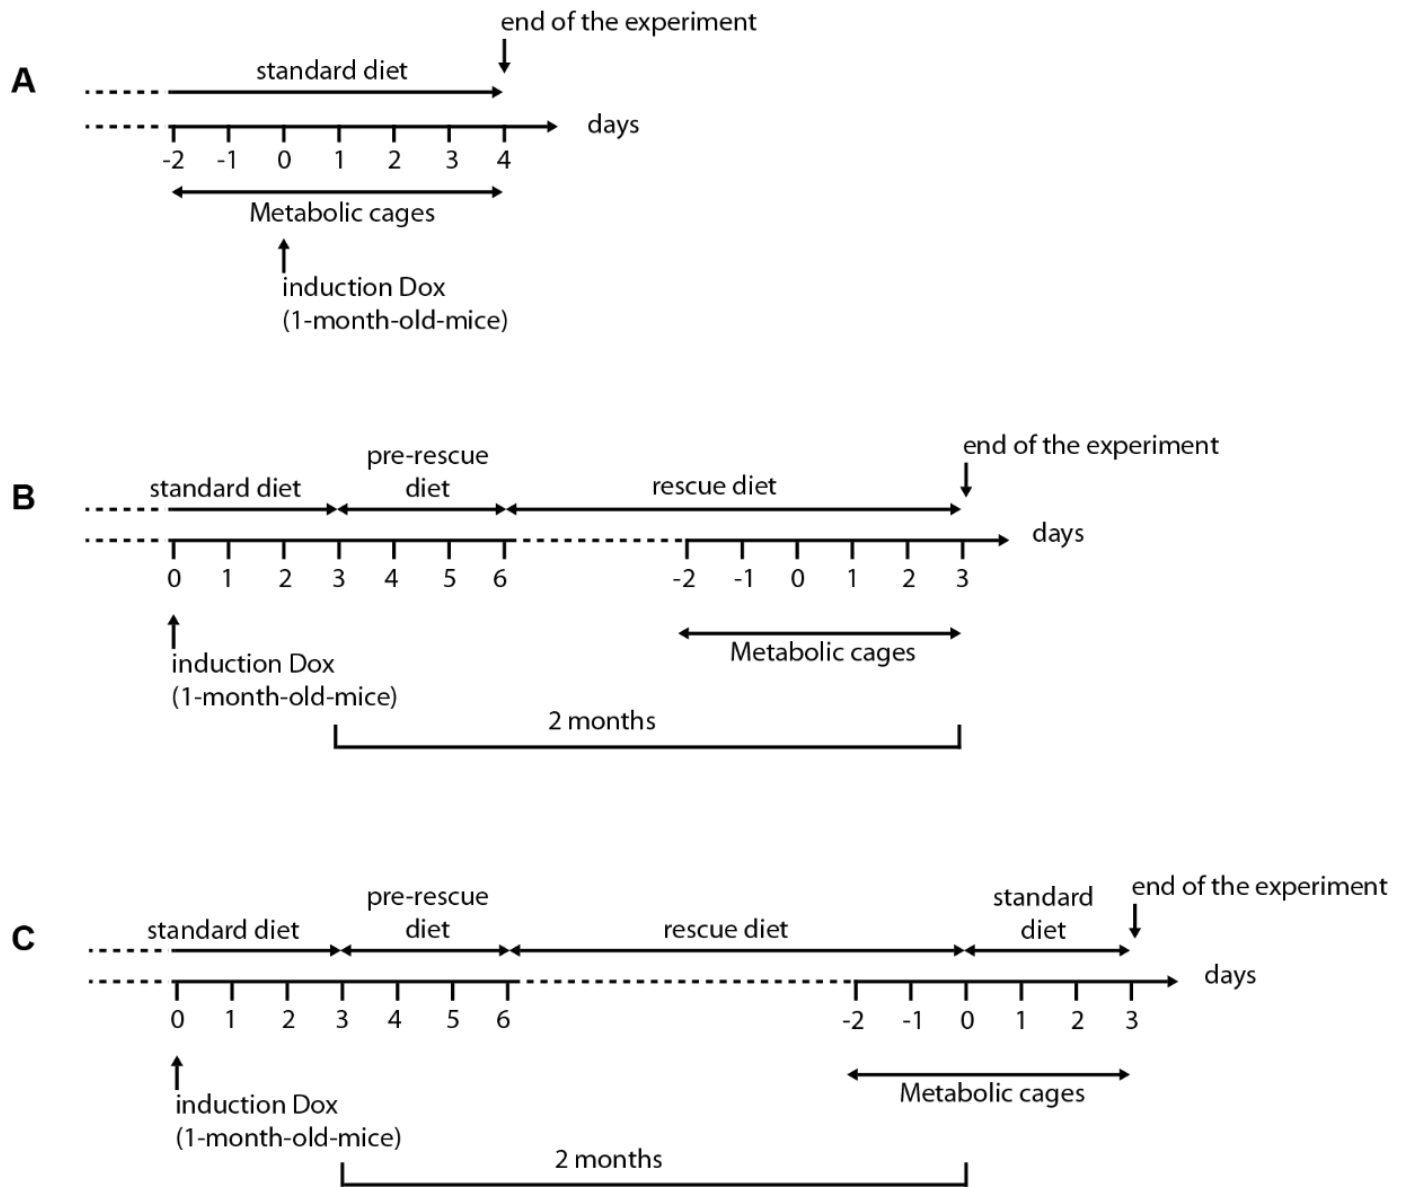

### Supplementary Figure 3 Schematic representation of the experimental protocols

Experimental setup to determine metabolic parameters in control and knockout animals induced by doxycycline (Dox) and kept under a **(A)** standard salt diet, a **(B)** high sodium / reduced potassium diet and **(C)** back to the standard diet following two months of high sodium / reduced potassium treatment.

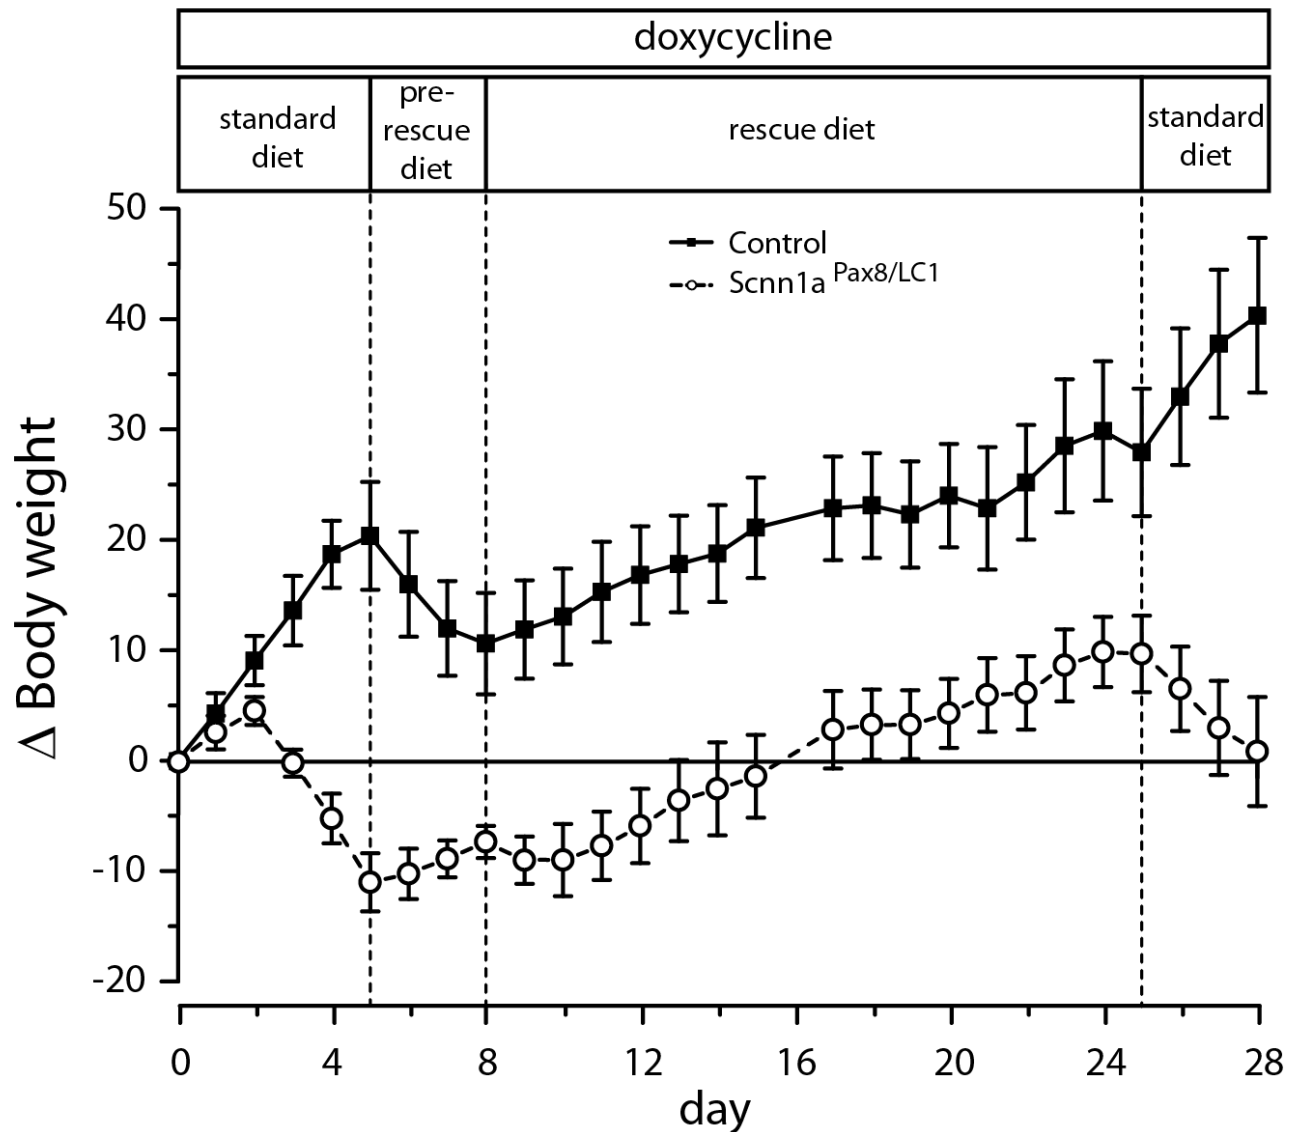

**Supplementary Figure 4 Diet-dependent body weight change in doxycycline-induced Scnn1a<sup>Pax8/LC1</sup> knockout mice**

Body weight changes (Δ body weight) in percentage of initial body weight in control (n=8) and Scnn1a<sup>Pax8/LC1</sup> knockout (n=9) mice following doxycycline-induction and subjected to different diet conditions as indicated. Standard diet: 0.17% Na<sup>+</sup> / 0.97% K<sup>+</sup>, (Day 0-5 and Day 25-28), pre-rescue diet: 3.5% Na<sup>+</sup> / 0% K<sup>+</sup>, (Day 5-8), rescue diet: 3.5% Na<sup>+</sup> / 0.2% K<sup>+</sup>, (Day 8-25).

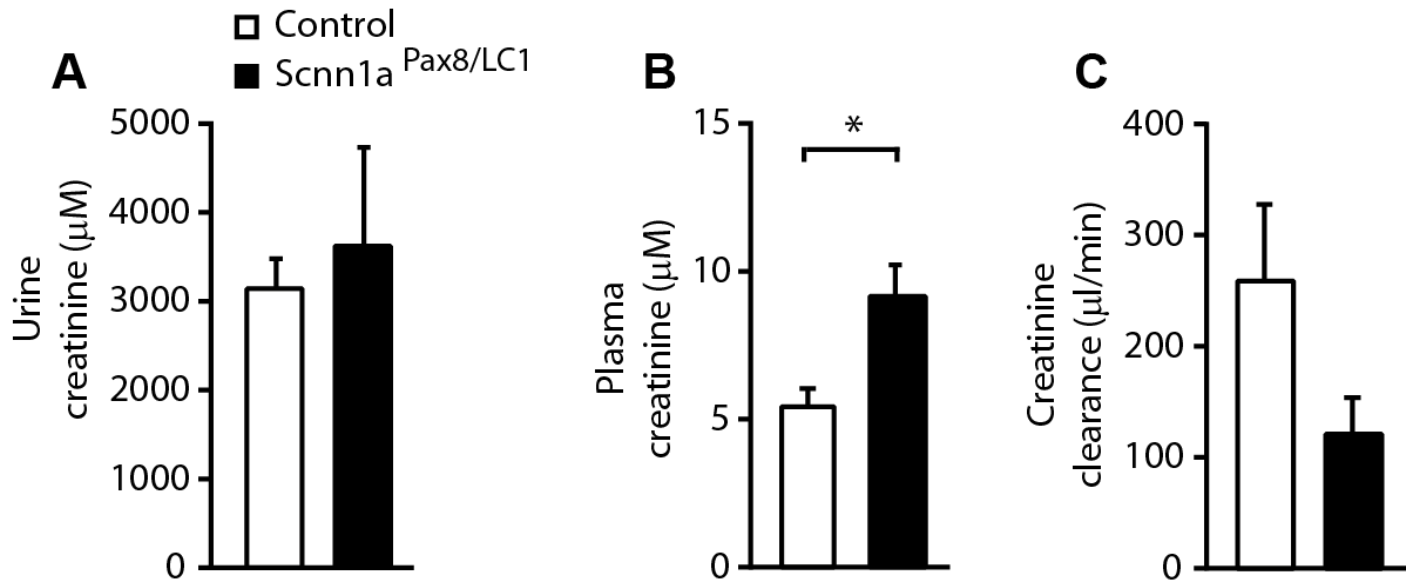

**Supplementary Figure 5 Creatinine concentration and creatinine clearance in the *Scnn1a*<sup>Pax8/LC1</sup> knockout mice**

(A) Urinary and (B) plasmatic creatinine concentrations in control (n=6) and knockout mice (n=5).  
(C) Creatinine clearance in control (n=6) and knockout mice (n=5).

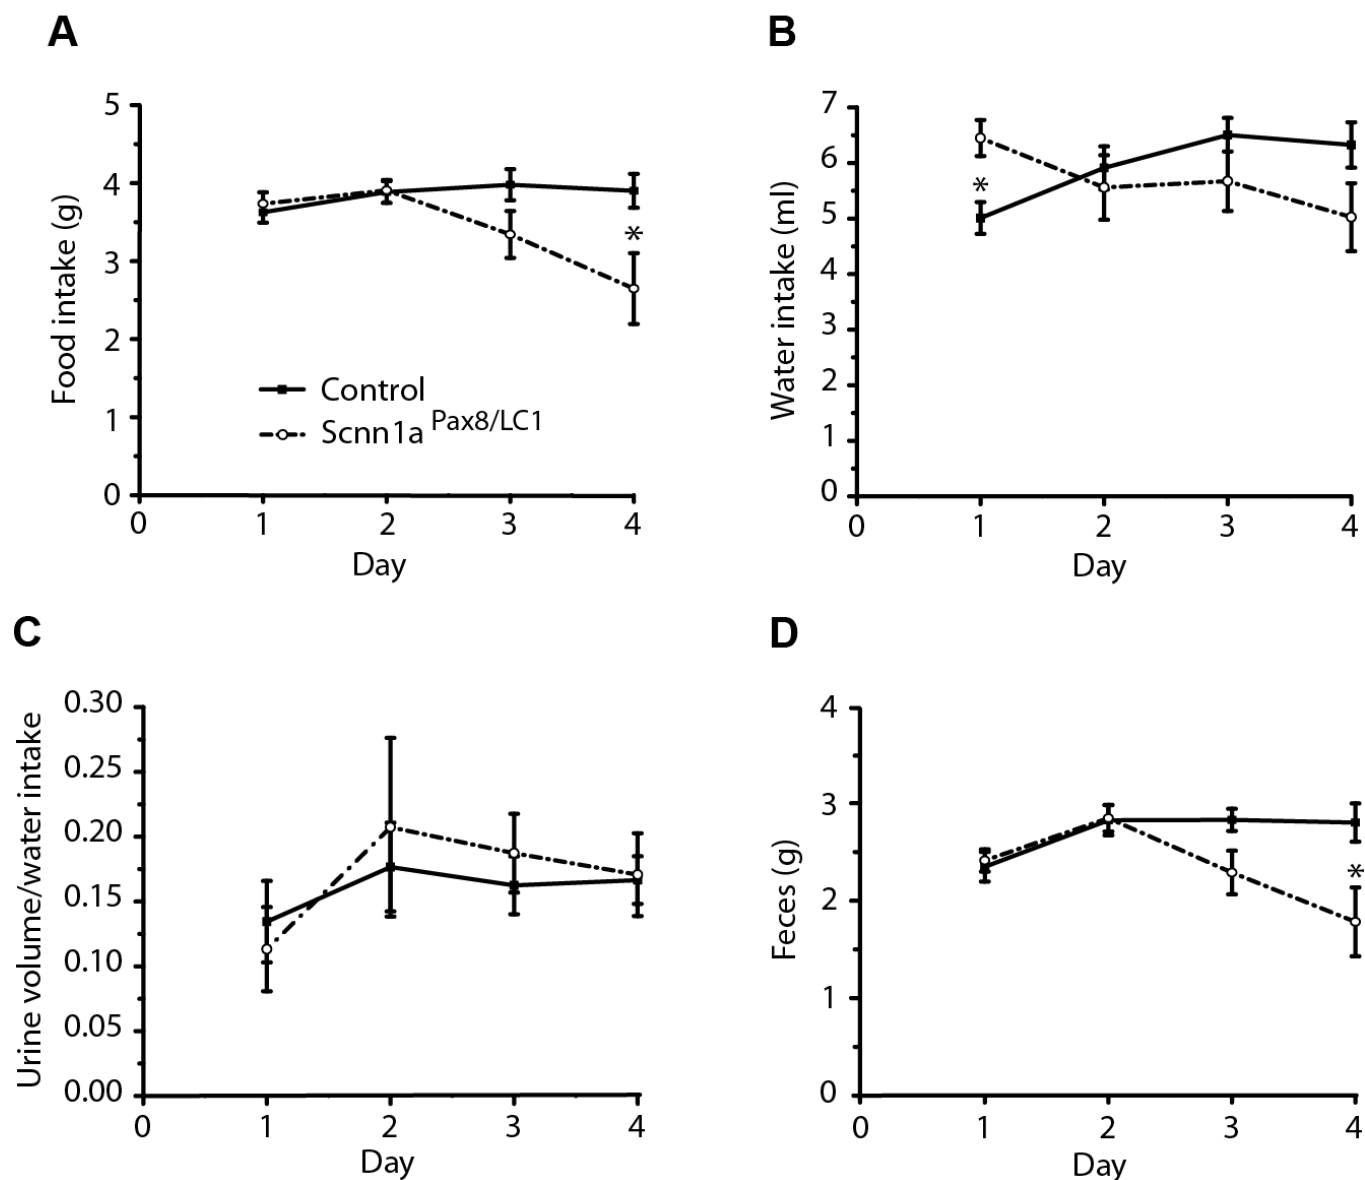

**Supplementary Figure 6 Measurement of physiological parameters following doxycycline induction under regular (standard) diet.**

**(A)** Food intake (g), **(B)** water intake (ml), **(C)** urine volume to water intake ratio and **(D)** amount of feces (g) daily measured in 4-week-old control (n=12) and Scnn1a<sup>Pax8/LC1</sup> knockout mice (n=10) under a standard salt diet.

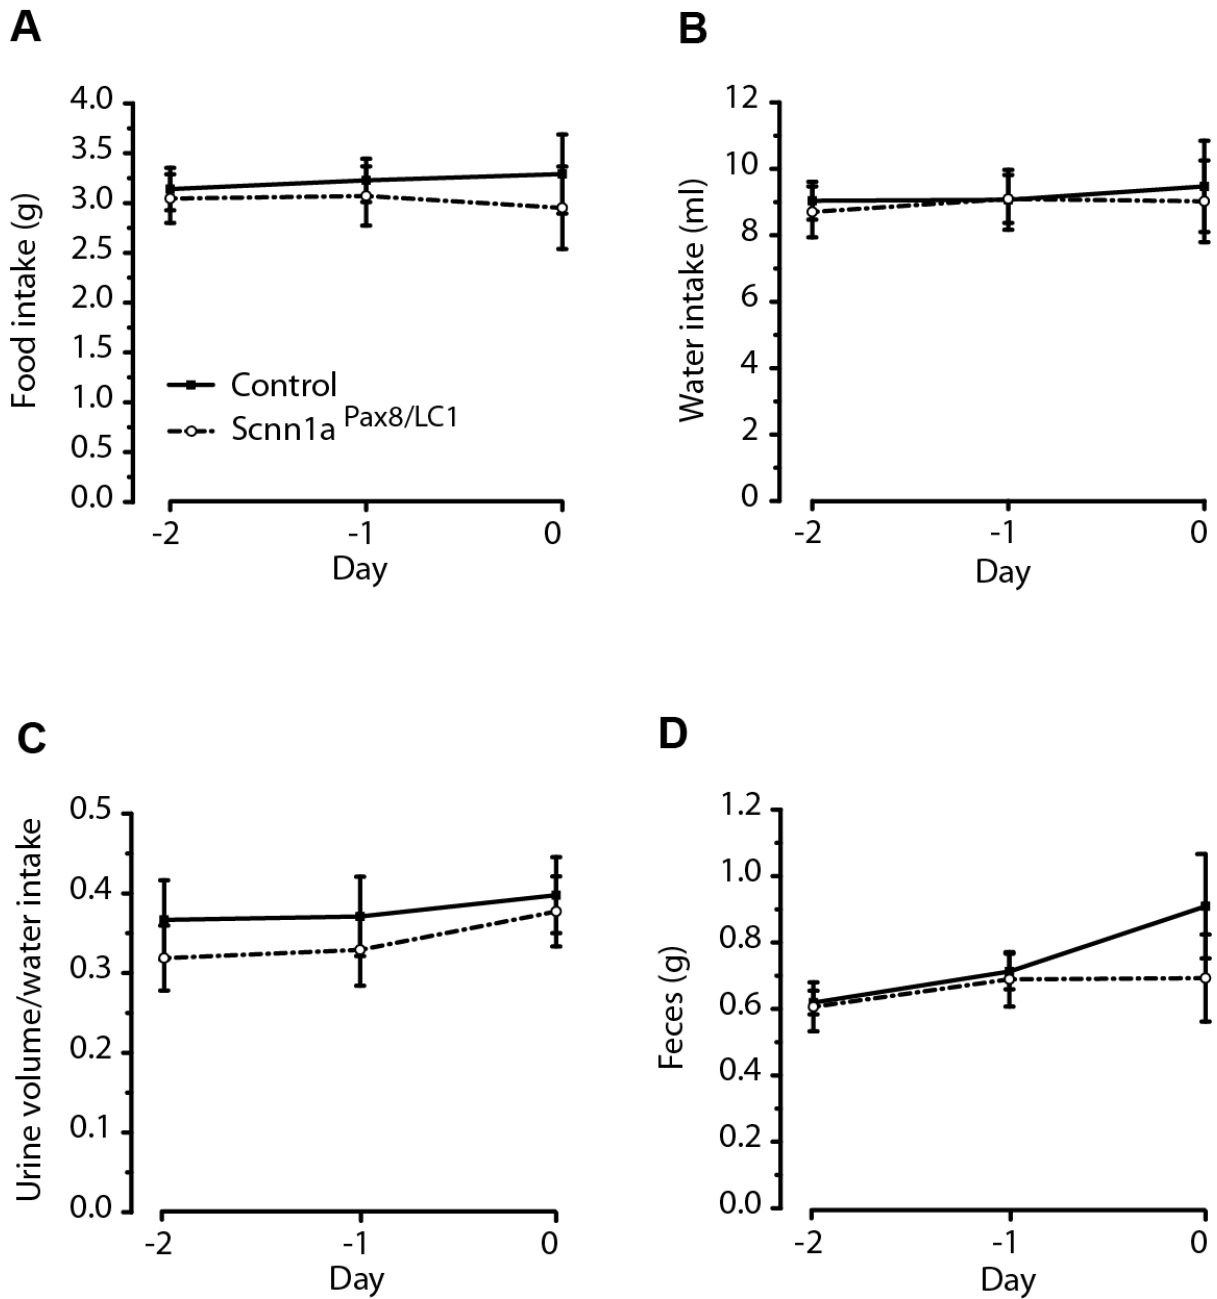

**Supplementary Figure 7 High Na<sup>+</sup> and reduced K<sup>+</sup> diet restores food and water intake and sodium and potassium excretion in  $\alpha$ ENaC knockout mice.**

**(A)** Food intake (g) **(B)** water intake (ml) **(C)** urine volume to water intake ratio and **(D)** feces amount (g) daily measured in control (n=11) and Scnn1a<sup>Pax8/LC1</sup> knockout mice (n=11) at the end of two months of high Na<sup>+</sup> and reduced K<sup>+</sup> diet.

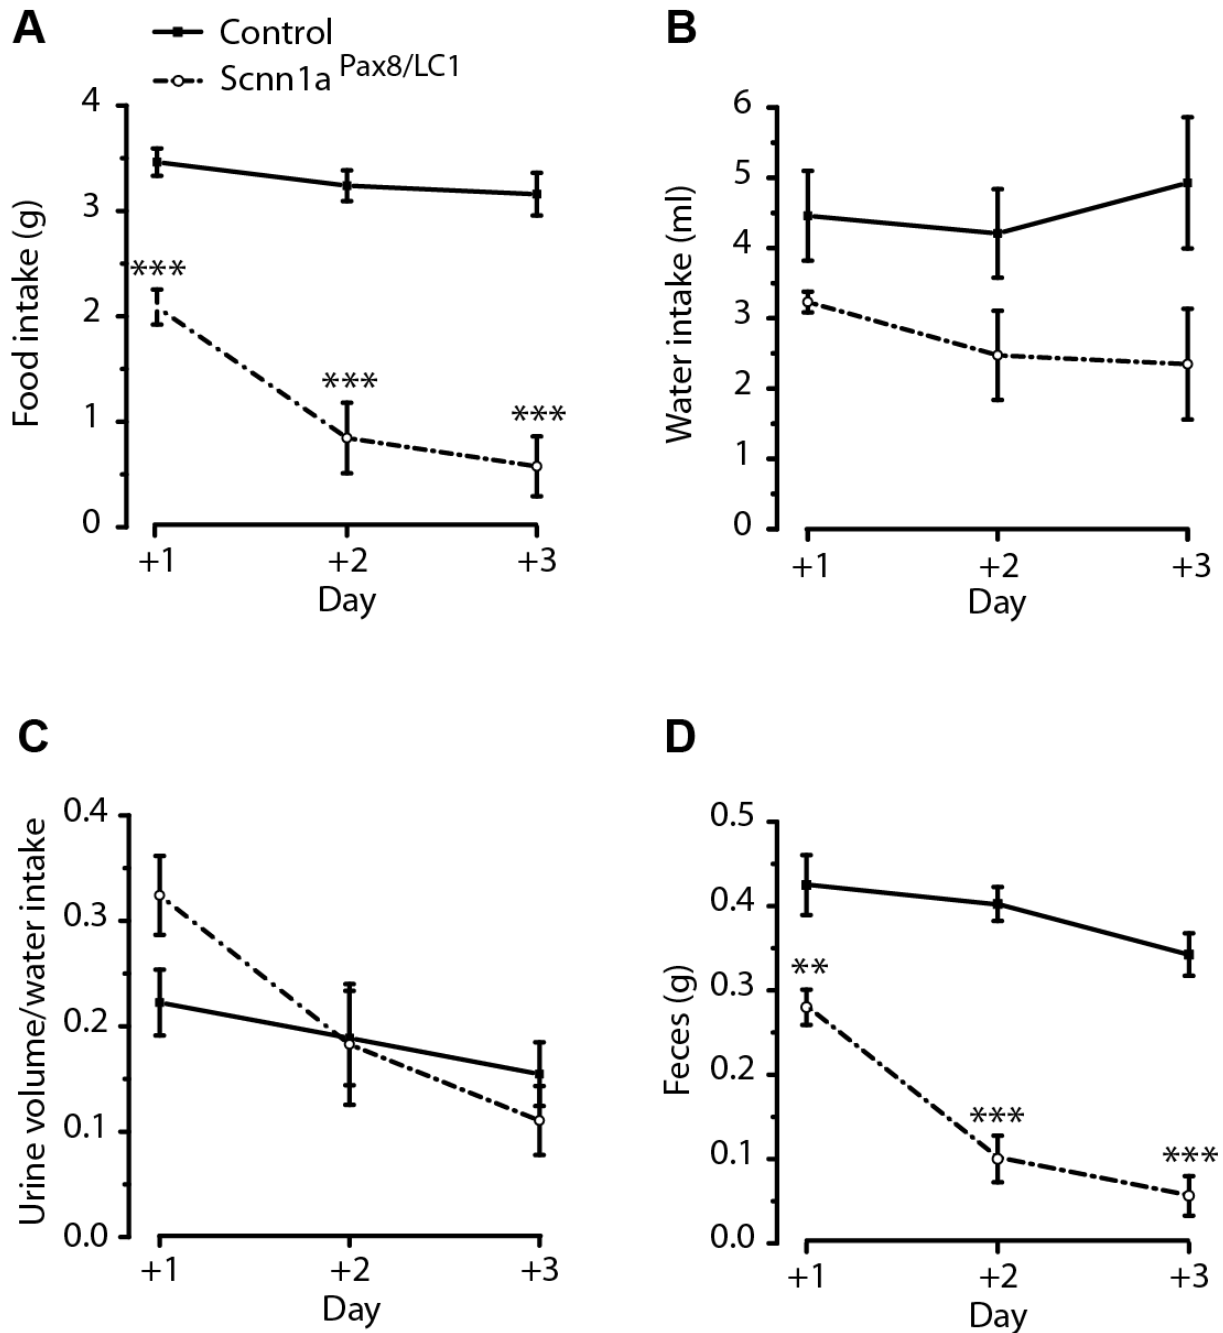

**Supplementary Figure 8 Reversible establishment of PHA1 following switch to standard diet in diet-rescued Scnn1a<sup>Pax8/LC1</sup> mice.**

(A) Food (g) and (B) water (ml) intake, (C) urine volume to water intake ratio and (D) feces amount (g) daily measured in control (n=8) and Scnn1a<sup>Pax8/LC1</sup> knockout mice (n=8) during three days of standard diet following two months of high Na<sup>+</sup> and reduced K<sup>+</sup> diet.
